# Supplementary material for: MoSx supported hematite with enhanced photoelectrochemical performance
Source: Royal Society of Chemistry journal article supplement (doi:10.1039/c5ta06743j), 2015-01-01
Supplement: c5ta06743j1.pdf [file c5ta06743j1.pdf]

## Supporting Information

### **MoS<sub>x</sub> Supported Hematite with Enhanced Photoelectrochemical Performance**

Hyo-Jin Ahn, Ki-Yong Yoon, Myung-Jun Kwak, Jung-Soo Lee, Pradheep Thiyagarajan and Ji-Hyun Jang\*

*School of Energy and Chemical Engineering, Low Dimensional Carbon Materials Center,  
689-798, UNIST, Korea.*

#### **Experimental section**

##### **Chemicals used**

Iron (III) chloride hexahydrate (FeCl<sub>3</sub>•6H<sub>2</sub>O, Kanto chemical, > 97.0%), Titanium(III) chloride solution (TiCl<sub>3</sub>, Sigma Aldrich, >12%), Ammonium tetrathiomolybdate ((NH<sub>4</sub>)MoS<sub>4</sub>, Sigma Aldrich, 99.97%), N,N-Dimethylformamide (DMF, Junsei, 99.5%), Sodium Hydroxide (NaOH, Samchun, extra pure), Ethanol (SK chemical, > 95%), Methylene blue (Sigma-Aldrich, >82%). All chemicals were used without further purification.

##### **Preparation of Ti-Fe<sub>2</sub>O<sub>3</sub> and MoS<sub>x</sub>/Ti-Fe<sub>2</sub>O<sub>3</sub>**

For the synthesis of Ti doped Fe<sub>2</sub>O<sub>3</sub> (Ti-Fe<sub>2</sub>O<sub>3</sub>), the FTO substrate was immersed in a mixture of 2.4 μl of TiCl<sub>3</sub> and 40 ml of FeCl<sub>3</sub>•6H<sub>2</sub>O and kept in a convection oven at 100 °C with a ramp rate of 1 °C/min for 4 hrs. The samples were washed with DI water and EtOH. Finally β-FeOOH was annealed at 550 °C for 1 h and 800 °C for 20 min in the furnace.

To fabricate precursors of MoS<sub>x</sub>, 0.1 wt% of (NH<sub>4</sub>)MoS<sub>4</sub> in DMF was diluted to the proper concentration. The 10 μwt%, 100 μwt% and 1000 μwt% of (NH<sub>4</sub>)MoS<sub>4</sub> solution was drop-casted on Ti-Fe<sub>2</sub>O<sub>3</sub> for 10-MoS<sub>x</sub>/Ti-Fe<sub>2</sub>O<sub>3</sub>, 100-MoS<sub>x</sub>/Ti-Fe<sub>2</sub>O<sub>3</sub> and 1000-MoS<sub>x</sub>/Ti-Fe<sub>2</sub>O<sub>3</sub>,

respectively, and annealing at 100 °C for 10 min. To fabricate MoS<sub>x</sub>/Ti-Fe<sub>2</sub>O<sub>3</sub>, the (NH<sub>4</sub>)MoS<sub>4</sub> treated Ti-Fe<sub>2</sub>O<sub>3</sub> was placed in a quartz tube with an outer diameter of 2 inch, heated at 700 °C under Ar (200 sccm) atmosphere with sulfur powder in alumina boat for 1 h.

### **Characterization.**

The structures was examined by SEM (S-4800 Hitachi, 10kV), TEM (JEM-2100, 200kV). The XRD data were obtained using a Rigaku Co. High Power X-Ray Diffractometer D/MAZZ 2500V/PC from 20° to 80°. The XPS data were obtained using k-alpha (Thermo Fisher, UK), The PL data were measured using a Cary Eclipse (Agilent, USA) at 400 nm excitation, The UV-visible extinction spectra were measured using a Cary-100 corns spectrophotometer (Varian).

### **Photoelectrochemical measurement**

The PEC performance of the Ti-Fe<sub>2</sub>O<sub>3</sub> and MoS<sub>x</sub>/Ti-Fe<sub>2</sub>O<sub>3</sub> electrodes was explored in a three-cell electrode system under front-side illumination of AM 1.5 G. An Ag/AgCl electrode and a Pt mesh were used as reference and counter electrodes, respectively. A solution of 1 M NaOH was used as an electrolyte. The exposed area of the working electrode was an exact value of 0.287 cm<sup>2</sup>. Photocurrent stability tests were carried out by measuring the photocurrent produced under chopped light irradiation (light/dark cycles of 30 s) at a bias of 1.50 V versus RHE. ). IPCE measurements were also conducted using an EQE system (Model QEX7) by PV Measurements Inc. (Boulder, Colorado) with 3 electrode system. Electrochemical impedance spectroscopy (EIS) was carried out at a frequency range from 100 kHz to 0.1 Hz using a potentiostat at 1.50 V<sub>RHE</sub>. The photodegradation of methylene blue (MB) was measured by separately immersing Ti-Fe<sub>2</sub>O<sub>3</sub> and MoS<sub>x</sub>/Ti-Fe<sub>2</sub>O<sub>3</sub> in 100ml of the MB solution (50mg/l in

water) under illumination. After the given exposure period, the absorbance change of MB was tracked by a UV-visible spectrophotometer to compare the photocatalytic activity.

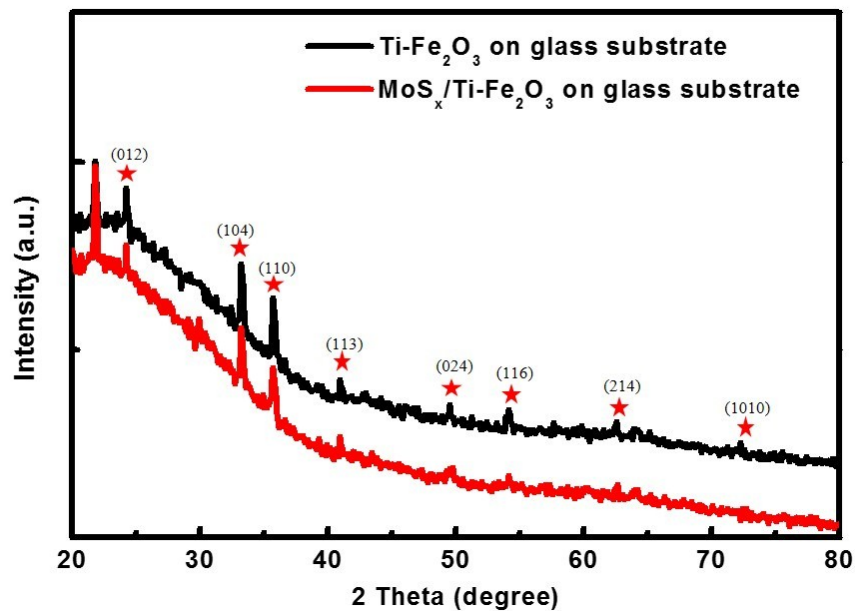

Figure S1. XRD patterns of the Ti-Fe<sub>2</sub>O<sub>3</sub> and MoS<sub>x</sub>/Ti-Fe<sub>2</sub>O<sub>3</sub> on the glass substrate.

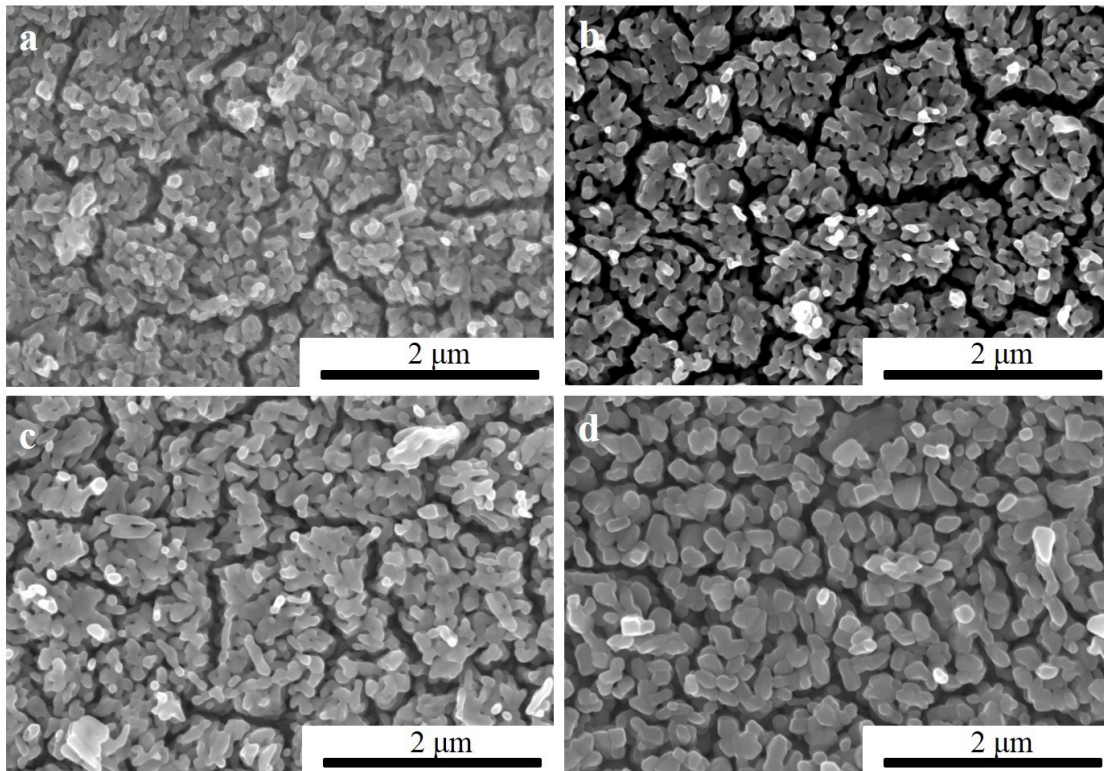

Figure S2. SEM images of (a) Ti-Fe<sub>2</sub>O<sub>3</sub>, (b) 10-MoS<sub>x</sub>/Ti-Fe<sub>2</sub>O<sub>3</sub>, (c) 100-MoS<sub>x</sub>/Ti-Fe<sub>2</sub>O<sub>3</sub> and (d) 1000-MoS<sub>x</sub>/Ti-Fe<sub>2</sub>O<sub>3</sub>.

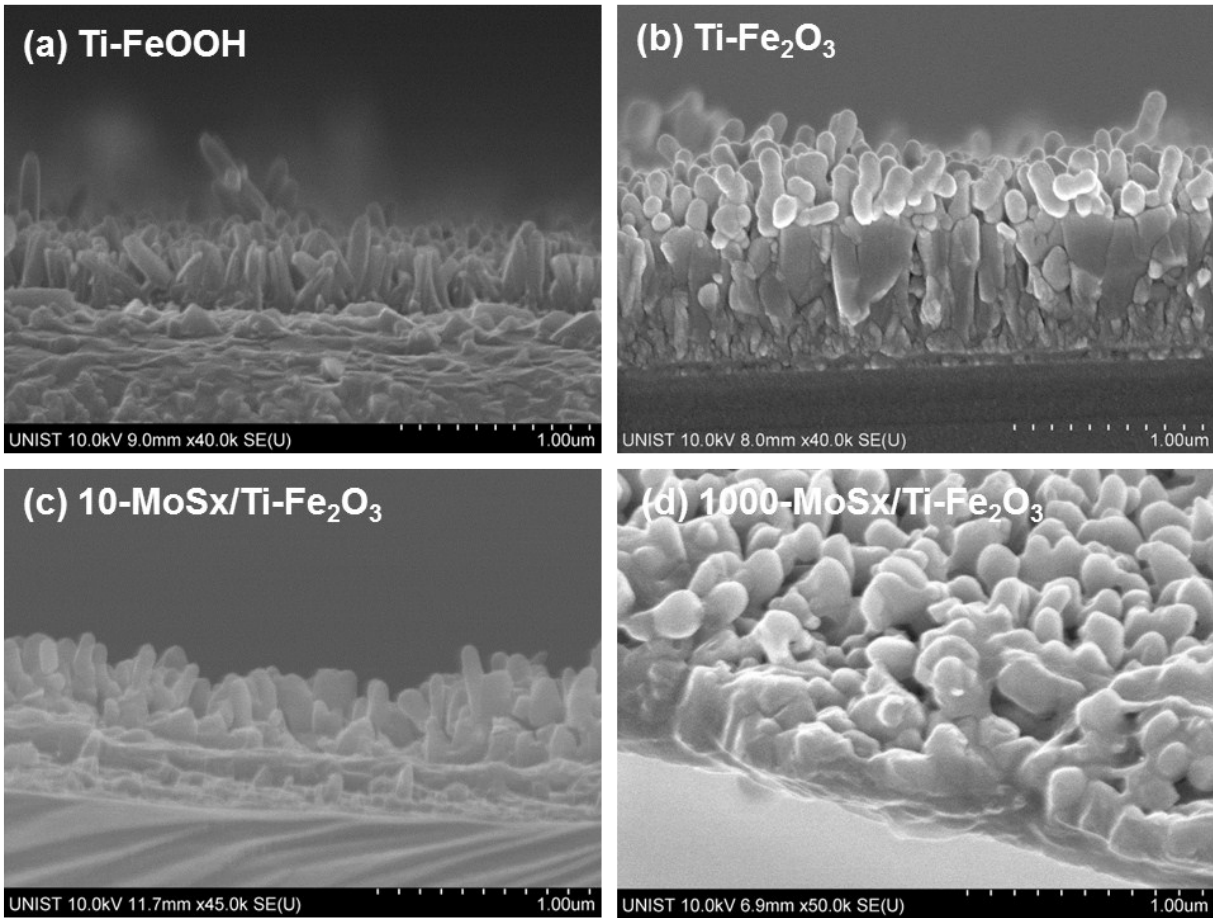

Figure S3. The cross-sectional SEM images of (a) Ti-FeOOH, (b) Ti-Fe<sub>2</sub>O<sub>3</sub>, (c) 10-MoSx/ Ti-Fe<sub>2</sub>O<sub>3</sub> and (d) 1000-MoSx/ Ti-Fe<sub>2</sub>O<sub>3</sub>.

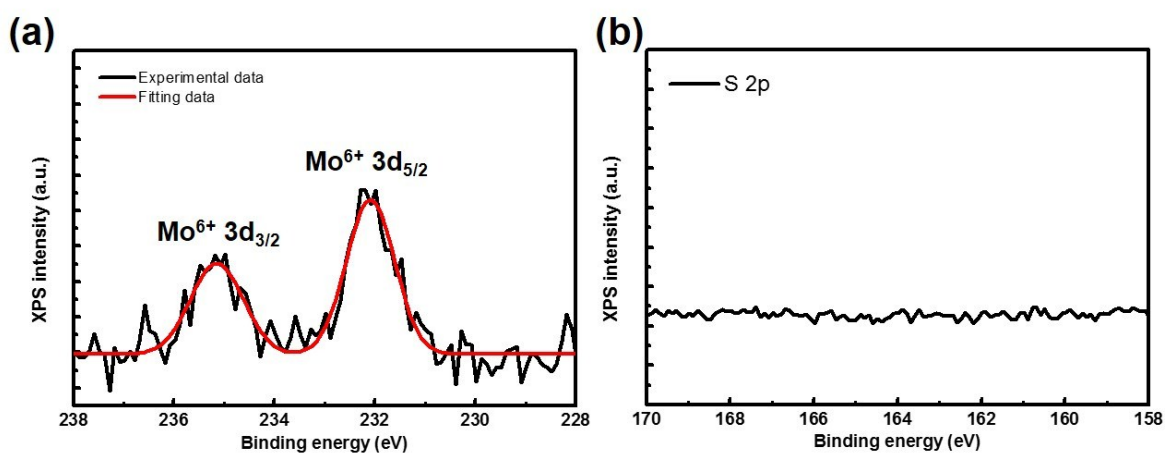

Figure S4. The XPS spectra of (a) Mo 3d and (b) S 2P. The sample was prepared from  $(\text{NH}_4)_2\text{MoS}_4/\text{Ti-Fe}_2\text{O}_3$  precursors without sulfur powder.

It is known that  $\text{MoS}_x$  is easily converted to the  $\text{MoO}_3$  with the oxygen components at high temperature.<sup>1</sup> The annealing of  $\text{MoS}_x$  without sulfur powder treatment resulted in the creation of  $\text{MoO}_3$  as shown in XPS data.

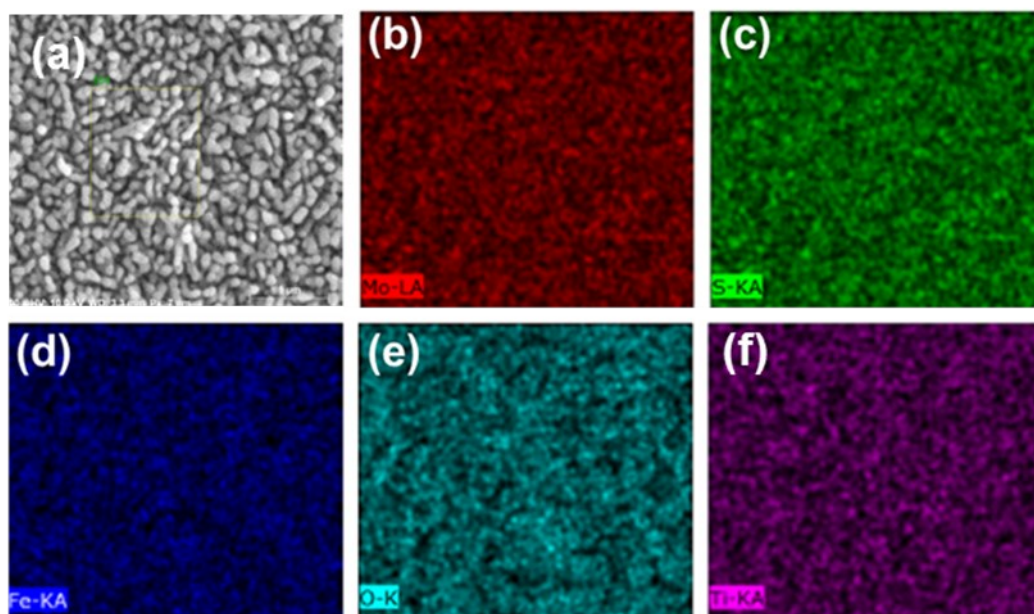

Figure S5. (a) SEM image and EDX mapping of (b) Mo, (c) S, (d) Fe, (e) O and (f) Ti in  $\text{MoS}_x/\text{Ti-Fe}_2\text{O}_3$ .

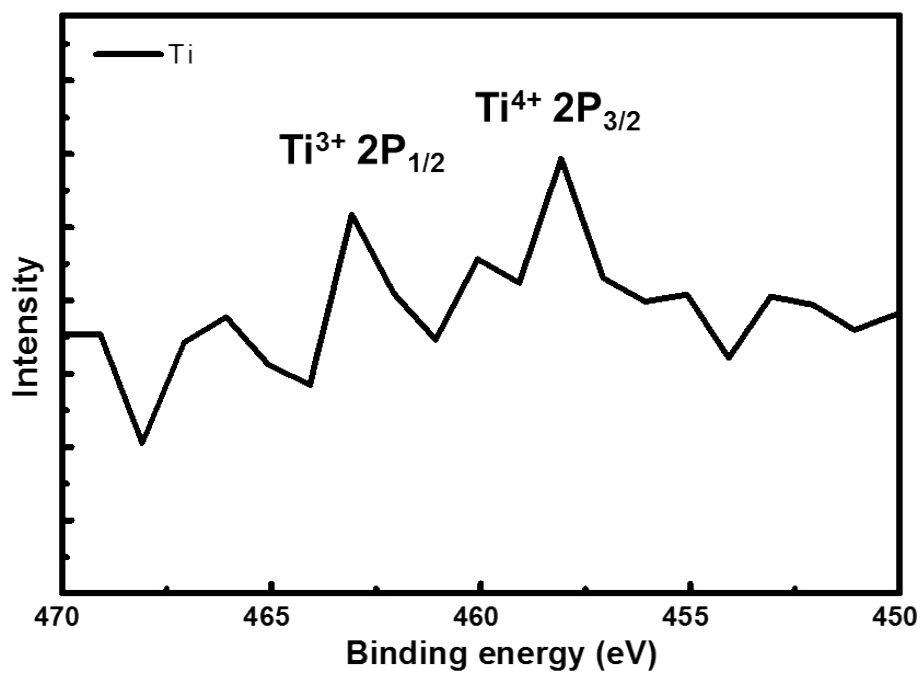

Figure S6. XPS of Ti ions of  $\text{Ti-Fe}_2\text{O}_3$ .

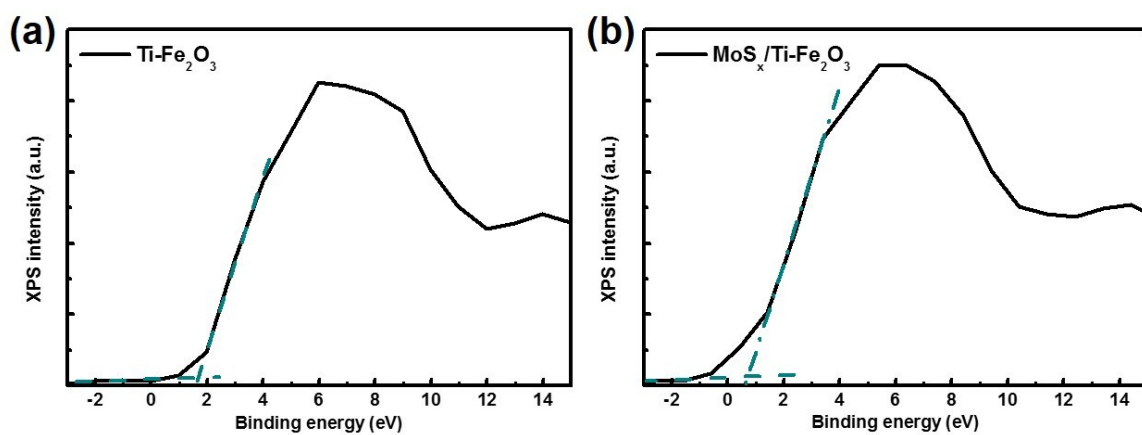

Figure S7. The valence band maximum (VBM) of (a)  $\text{Ti-Fe}_2\text{O}_3$  (1.65 eV) and (b)  $\text{MoS}_x/\text{Ti-Fe}_2\text{O}_3$  (0.78 eV).

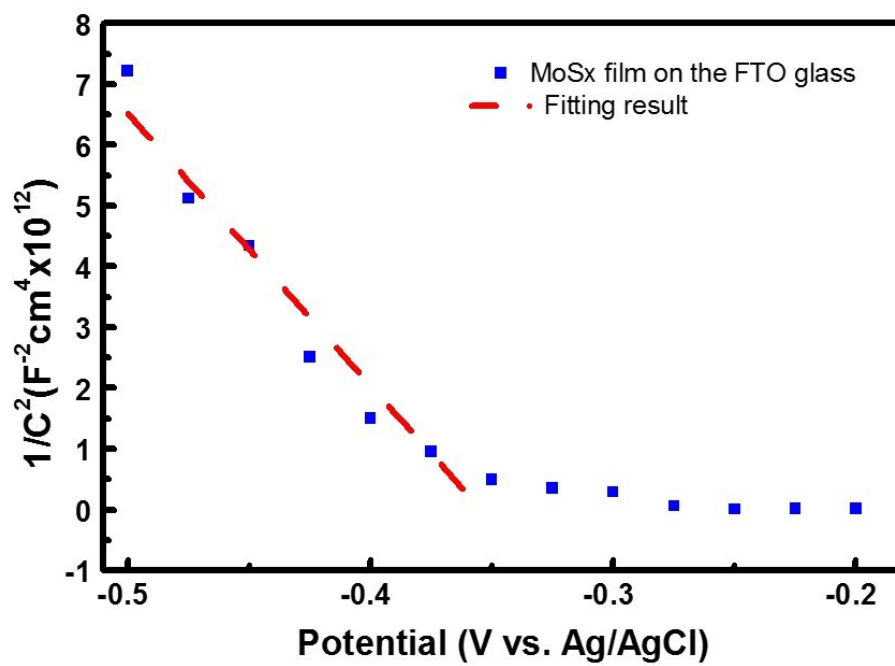

Figure S8. Mott-Schottky plots of MoS<sub>x</sub> on the FTO glass in 0.5M NaSO<sub>4</sub> electrolyte.

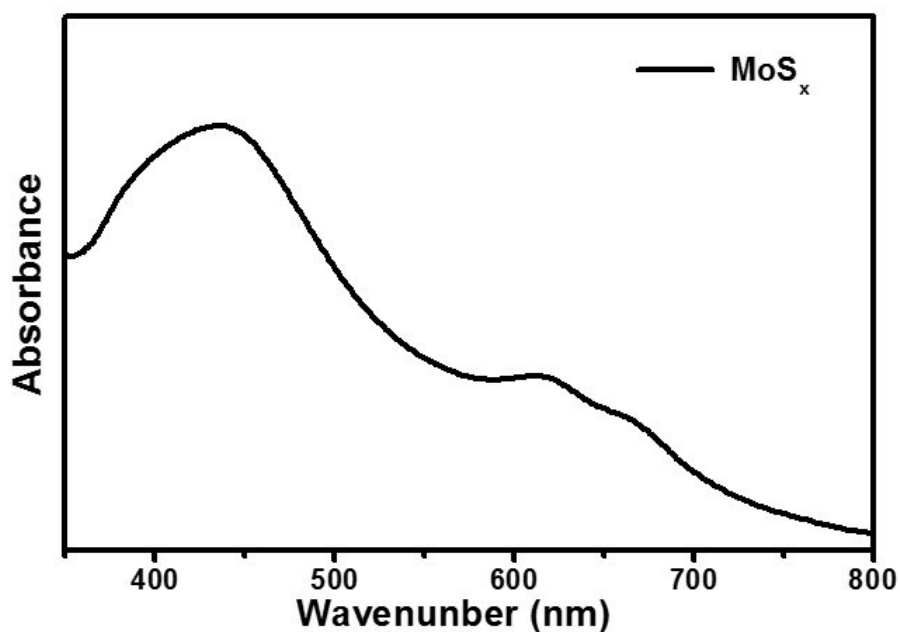

**Figure S9.** The UV-Vis spectrum of MoS<sub>x</sub> on FTO glass.

The absorption at 450 nm is assigned to a direct transition peak from the deep valence band to the conduction band of MoS<sub>2</sub>. The peaks at 610 and 670 nm are attributed to the direct excitonic transitions at the K point of the Brillouin zone.<sup>1-3</sup>

1. Gopalakrishnan, D.; Damien, D.; Shaijumon, M. M. *ACS Nano* **2014**, 8, (5), 5297-5303.
2. Frey, G. L.; Elani, S.; Homyonfer, M.; Feldman, Y.; Tenne, R. *Physical Review B* **1998**, 57, (11), 6666-6671.
3. Posudievsky, O. Y.; Khazieieva, O. A.; Cherepanov, V. V.; Dovbeshko, G. I.; Shkavro, A. G.; Koshechko, V. G.; Pokhodenko, V. D. *J. Mater. Chem. C* **2013**, 1, (39), 6411-6415.



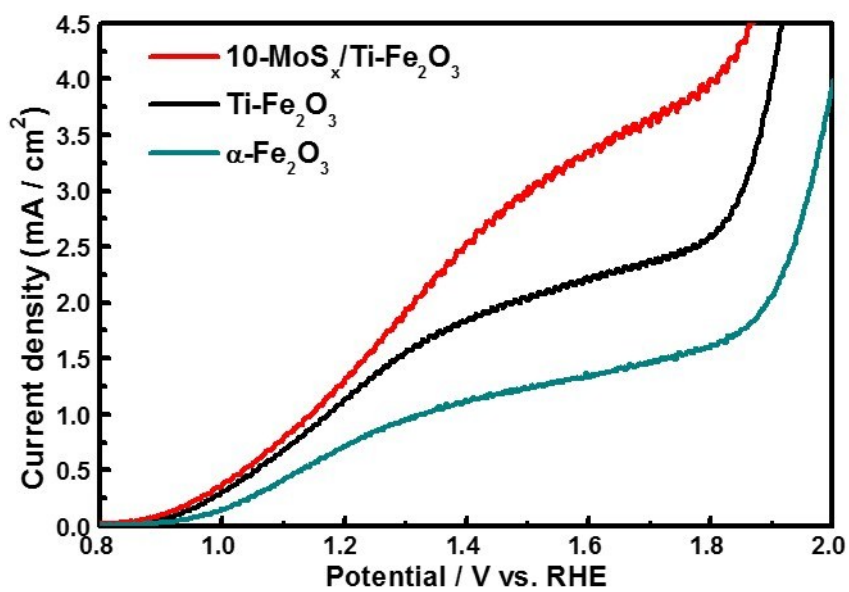

Figure S10. I-V curve of  $\alpha$ -Fe<sub>2</sub>O<sub>3</sub>, Ti-Fe<sub>2</sub>O<sub>3</sub> and 10-MoS<sub>x</sub>/Ti-Fe<sub>2</sub>O<sub>3</sub>.

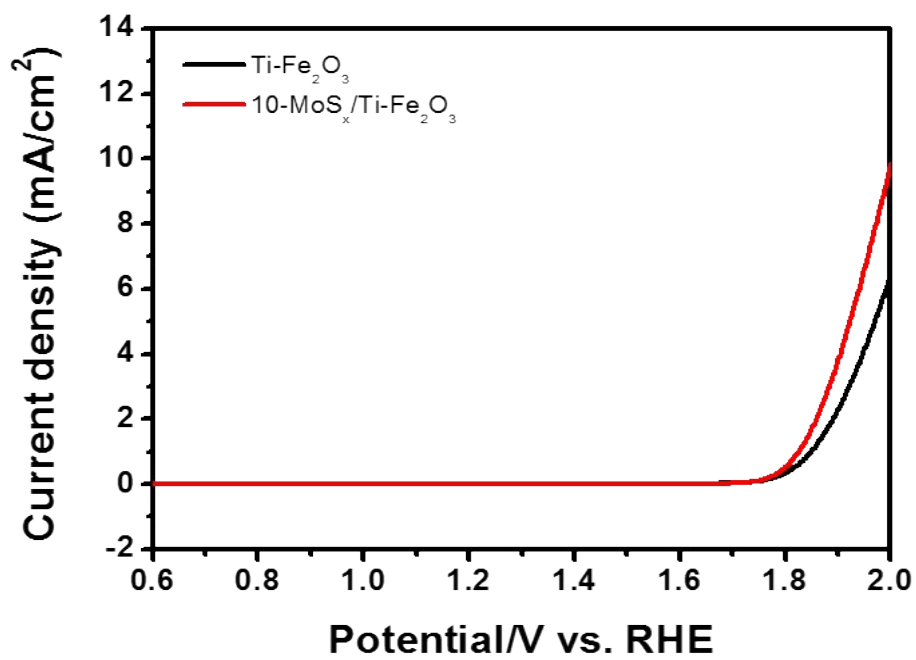

Figure S11. Dark current density of Ti-Fe<sub>2</sub>O<sub>3</sub> and 10-MoS<sub>x</sub>/ Ti-Fe<sub>2</sub>O<sub>3</sub>

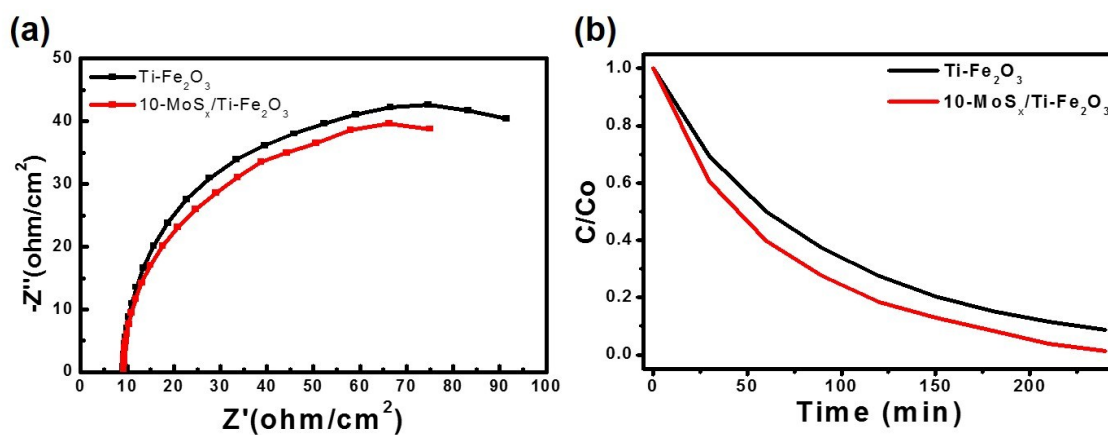

Figure S11. (a) The EIS data of  $\text{Ti-Fe}_2\text{O}_3$  and  $10\text{-MoS}_x/\text{Ti-Fe}_2\text{O}_3$  at  $1.23 V_{\text{RHE}}$ . (b) The photodegradation of methylene blue by  $\text{Ti-Fe}_2\text{O}_3$  and  $10\text{-MoS}_x/\text{Ti-Fe}_2\text{O}_3$  without applying voltage under AM 1.5.

Table S1. Electrochemical parameters of photoanodes from equivalent circuit model.

| $(R \cdot \Omega \text{ cm}^2)$                                | $R_s$        | $R_1$         | $R_2$        |
|----------------------------------------------------------------|--------------|---------------|--------------|
| $(C / F)$                                                      |              | $C_1$         | $C_2$        |
| <b><math>\text{Ti-Fe}_2\text{O}_3</math></b>                   | <b>14.2</b>  | <b>110</b>    | <b>380</b>   |
|                                                                | .            | $7.89e^{-5}$  | $9.03e^{-5}$ |
| <b><math>10\text{-MoS}_x/\text{Ti-Fe}_2\text{O}_3</math></b>   | <b>14.36</b> | <b>95.6</b>   | <b>125</b>   |
|                                                                | .            | $9.86e^{-5}$  | $6.10e^{-4}$ |
| <b><math>100\text{-MoS}_x/\text{Ti-Fe}_2\text{O}_3</math></b>  | <b>14.56</b> | <b>100.5</b>  | <b>175</b>   |
|                                                                | .            | $7.99e^{-5}$  | $4.36e^{-4}$ |
| <b><math>1000\text{-MoS}_x/\text{Ti-Fe}_2\text{O}_3</math></b> | <b>15.05</b> | <b>280.08</b> | <b>784.6</b> |
|                                                                | .            | $5.64e^{-7}$  | $1.82e^{-6}$ |

1. Naguman, P. N.; Karimova, L. M.; Tokaeva, Z. M.; Shinbaev, U. B. *Russ. J. Non-ferrous Metals* **2009**, 50, (4), 330-334.
